# Supplementary material for: Tetrapod axial evolution and developmental constraints; Empirical underpinning by a mouse model
Source: PubMed Central journal article supplement — Mech Dev. 2015 Nov;138:64–72. doi: 10.1016/j.mod.2015.07.006 (PMC4678112; doi:10.1016/j.mod.2015.07.006), 2015-11
Supplement: mmc2.pdf [file mmc2.pdf]

A

Tetraodon  
(TETRAODON8:21:3002595:3024897:-1)

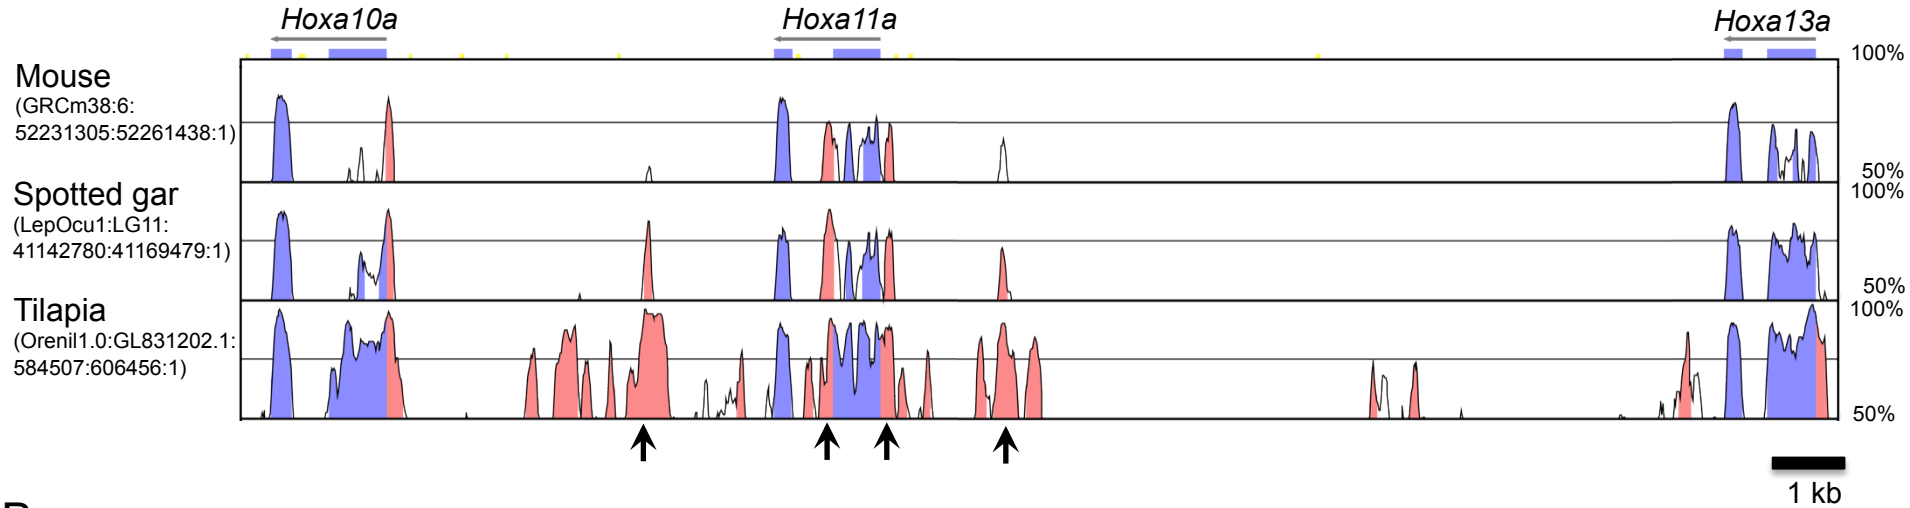

B

Length: 325  
Identity: 196/325 (60.3%)  
Similarity: 225/325 (69.2%)  
Gaps: 56/325 (17.2%)  
Score: 919.0

|             |     |                                                                                                     |     |
|-------------|-----|-----------------------------------------------------------------------------------------------------|-----|
| mmu-HOXA11  | 1   | M M D F D E R G P C S S N M Y L P S C T Y Y V S - G P D F S S L P S F L P Q T P S S R P M T Y S Y S | 49  |
| tni-HOXA11A | 1   | M M D F D E R V P V G S N M Y L P S C T Y Y V S A G A D F S G L P S F - - - - S T R P M T Y S Y S   | 45  |
| mmu-HOXA11  | 50  | S N L P O V Q P V R E V T F R E Y - A I E P A T K W H P R G N L A H C Y - S A E E L V H R D C L Q A | 97  |
| tni-HOXA11A | 46  | S N L P O V Q P V R E V T F R D Y A A I D A S G K W S H R G N L P Q C Y P S A E D M V H R D C L S A | 95  |
| mmu-HOXA11  | 98  | P S A A G V P G D V L A K S S - - A N V Y H H - - - - - P T P A V S S N F Y S T V G R N G V L P Q   | 139 |
| tni-HOXA11A | 96  | Q T A - - V V G D M P G K N S P A A A A Y H H H H H H H A S A G S A A T N F Y G N V G R N G V L P Q | 143 |
| mmu-HOXA11  | 140 | A F D Q F F E T A Y G - T P E N L A S S D Y P G D K N A E K G P Q A A A A T S A A A V A A A A T G A | 188 |
| tni-HOXA11A | 144 | A F D Q F Y D T A Y G N A S E N S S T N G F S G D K T P T K - - Q A S S A P E D A Q - - - - -       | 183 |
| mmu-HOXA11  | 189 | P A T S S S D G G G G G C Q E A A A A E K E R R R R P E S S S S P E S S G H T E D K A G G S G G     | 238 |
| tni-HOXA11A | 184 | - - - - - A C R D T G A K E P R - - - - - E E T S S P E L S - - - - - S D G                         | 206 |
| mmu-HOXA11  | 239 | Q R T R K K R C P Y T K Y Q I R E L E R E F F S V Y I N K E K R L Q L S R M L N L T D R Q V K I W   | 288 |
| tni-HOXA11A | 207 | Q R T R K K R C P Y S K Y Q I R E L E R E F F S V Y I N K E K R M Q L S R M L N L T D R Q V K I W   | 256 |
| mmu-HOXA11  | 289 | F Q N R R M K E K K I N R D R L Q Y Y S A N P L L                                                   | 313 |
| tni-HOXA11A | 257 | F Q N R R M K E K K L N R D R L Q Y Y T S N P L L                                                   | 281 |

DUF3528

homeodomain

1 kb
